# Supplementary material for: Dermal Papilla Cell-Derived Extracellular Vesicles Increase Hair Inductive Gene Expression in Adipose Stem Cells via β-Catenin Activation
Source: MDPI journal article supplement (doi:10.3390/cells11020202), 2022-01-07
Supplement: s1 [file s1]

## Surface marker expression of ASCs, and their DP-related gene expression at different combinations of adipogenic and osteogenic factors.

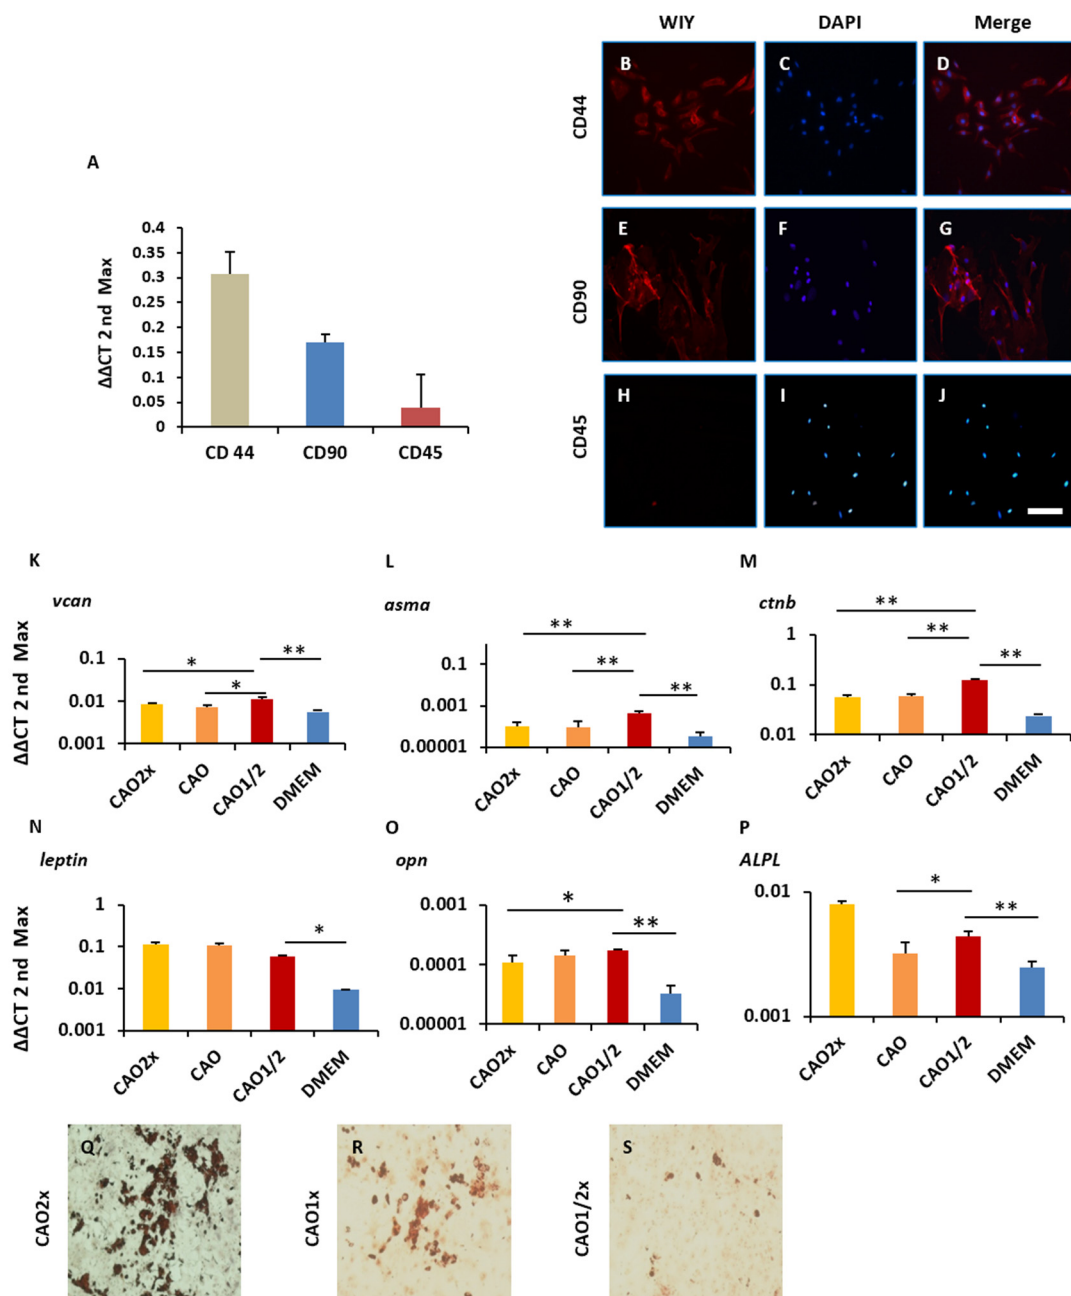

**Supplementary Figure S1.** Surface marker expression of ASCs, and their DP-related gene expression at different combinations of adipogenic and osteogenic factors. (A) gene expression of CD44 and CD90 are positive markers, and CD45 is a negative marker of ASCs. (B–G) Immunocytochemical expression Positive surface markers of ASCs and (H–J) negative surface markers, white scale bar represents 100  $\mu m$ . (K–P) Hair inductive gene expression observed in ASCs cultured in co-induction media of adipogenic and osteogenic inducers at various concentrations. (Q–R) Representative photographs of ASCs differentiation into adipocytes and osteocytes induced by Adipogenic and osteogenic inducers at various concentration, (S) but no oil droplet was observed in lowest concentration referred as CAO1/2 which were detected by Oil red O and BCIP/NBT co-stain. The mean value  $\pm$  SD was calculated from the average of triplicate measurements (\*  $p < 0.05$ , \*\*  $p < 0.01$ , CAO2x, CAO, CAO1/2 and DMEM).

## Growth factor expressions of ASCs stimulated with CAO1/2

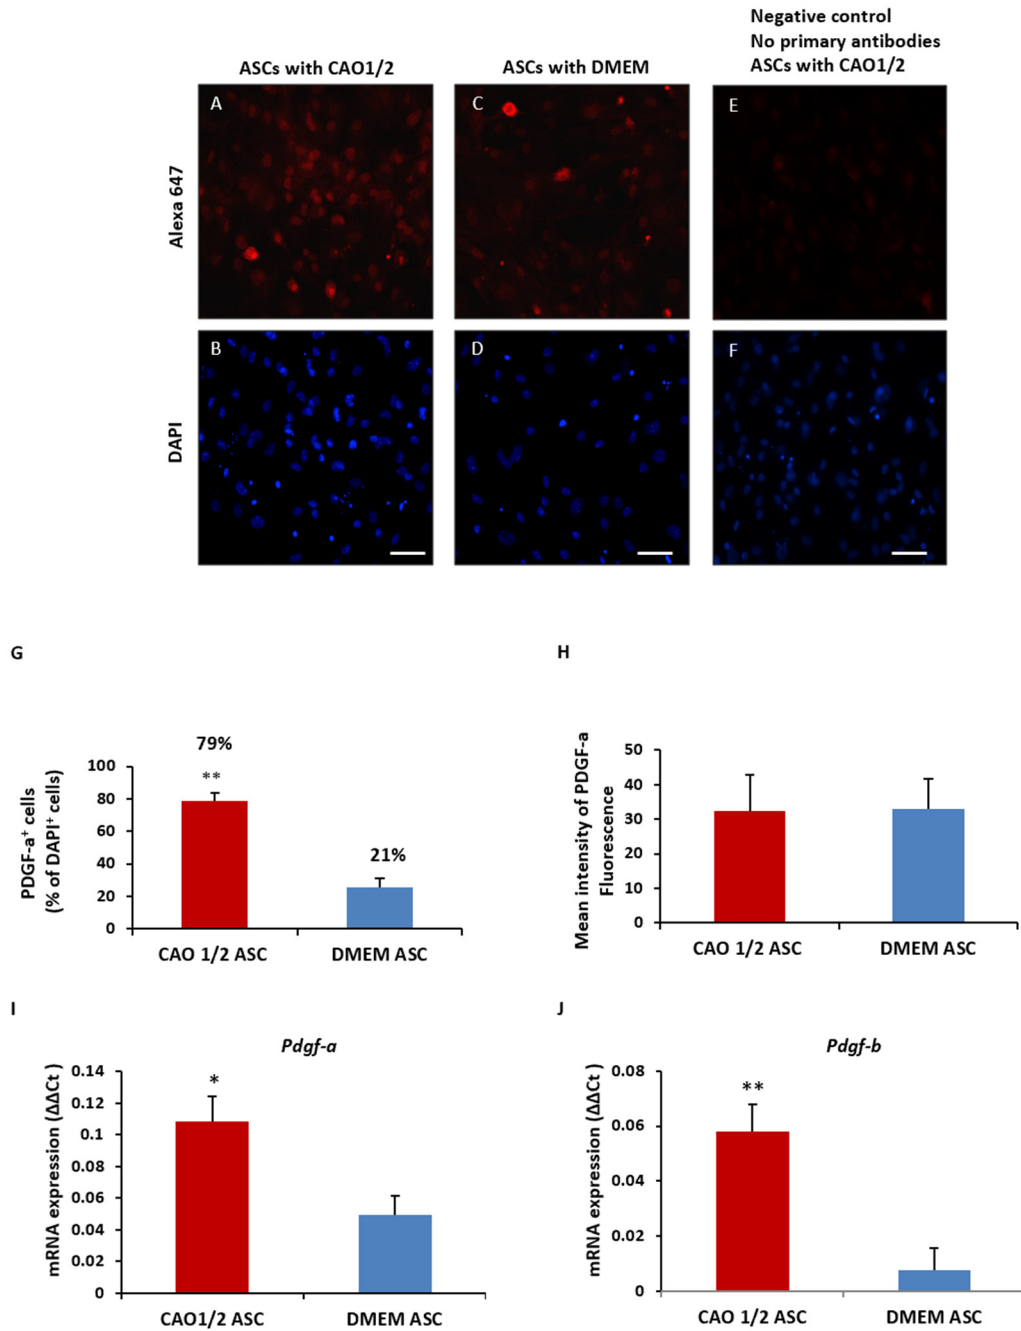

**Supplementary Figure S2.** Growth factor expression of ASCs stimulated with CAO1/2. (A and B) Immunocytochemical expression of endogenous PDGF-a in CAO1/2 stimulated ASCs, (C and D) DMEM-stimulated ASCs, and (E and F) negative control (no primary antibodies). (G) The percentage of PDGF-positive cells were measured from the total nuclei of randomly selected fields. (H) The fluorescence intensity of PDGF-a was measured using ImageJ. (I and J) The mRNA expression of growth factors was quantified by qPCR. The mean value  $\pm$  SD was calculated from the average of triplicate measurements. White scale bar represents 100 $\mu$ m (\*  $p < 0.05$ , \*\*  $p < 0.01$ ).
